# Supplementary material for: Zinc-redox crosstalk regulates proteostasis in the endoplasmic reticulum
Source: Research Square preprint supplement (doi:10.21203/rs.3.rs-7251469/v1), 2025-08-12
Supplement: Supplementary file 1 [file c198a7a89664a7c10109a04d.docx]

**Supplementary information**

**Zinc-redox crosstalk regulates proteostasis in the endoplasmic reticulum**

Yuta Amagai, Chihiro Arai, Wakana Yamamoto, Satoshi Watanabe, Toshiyuki Kowada, Roberto Sitia, Jun Hoseki, Shin Mizukami, Masaki Matsumoto, and Kenji Inaba

**
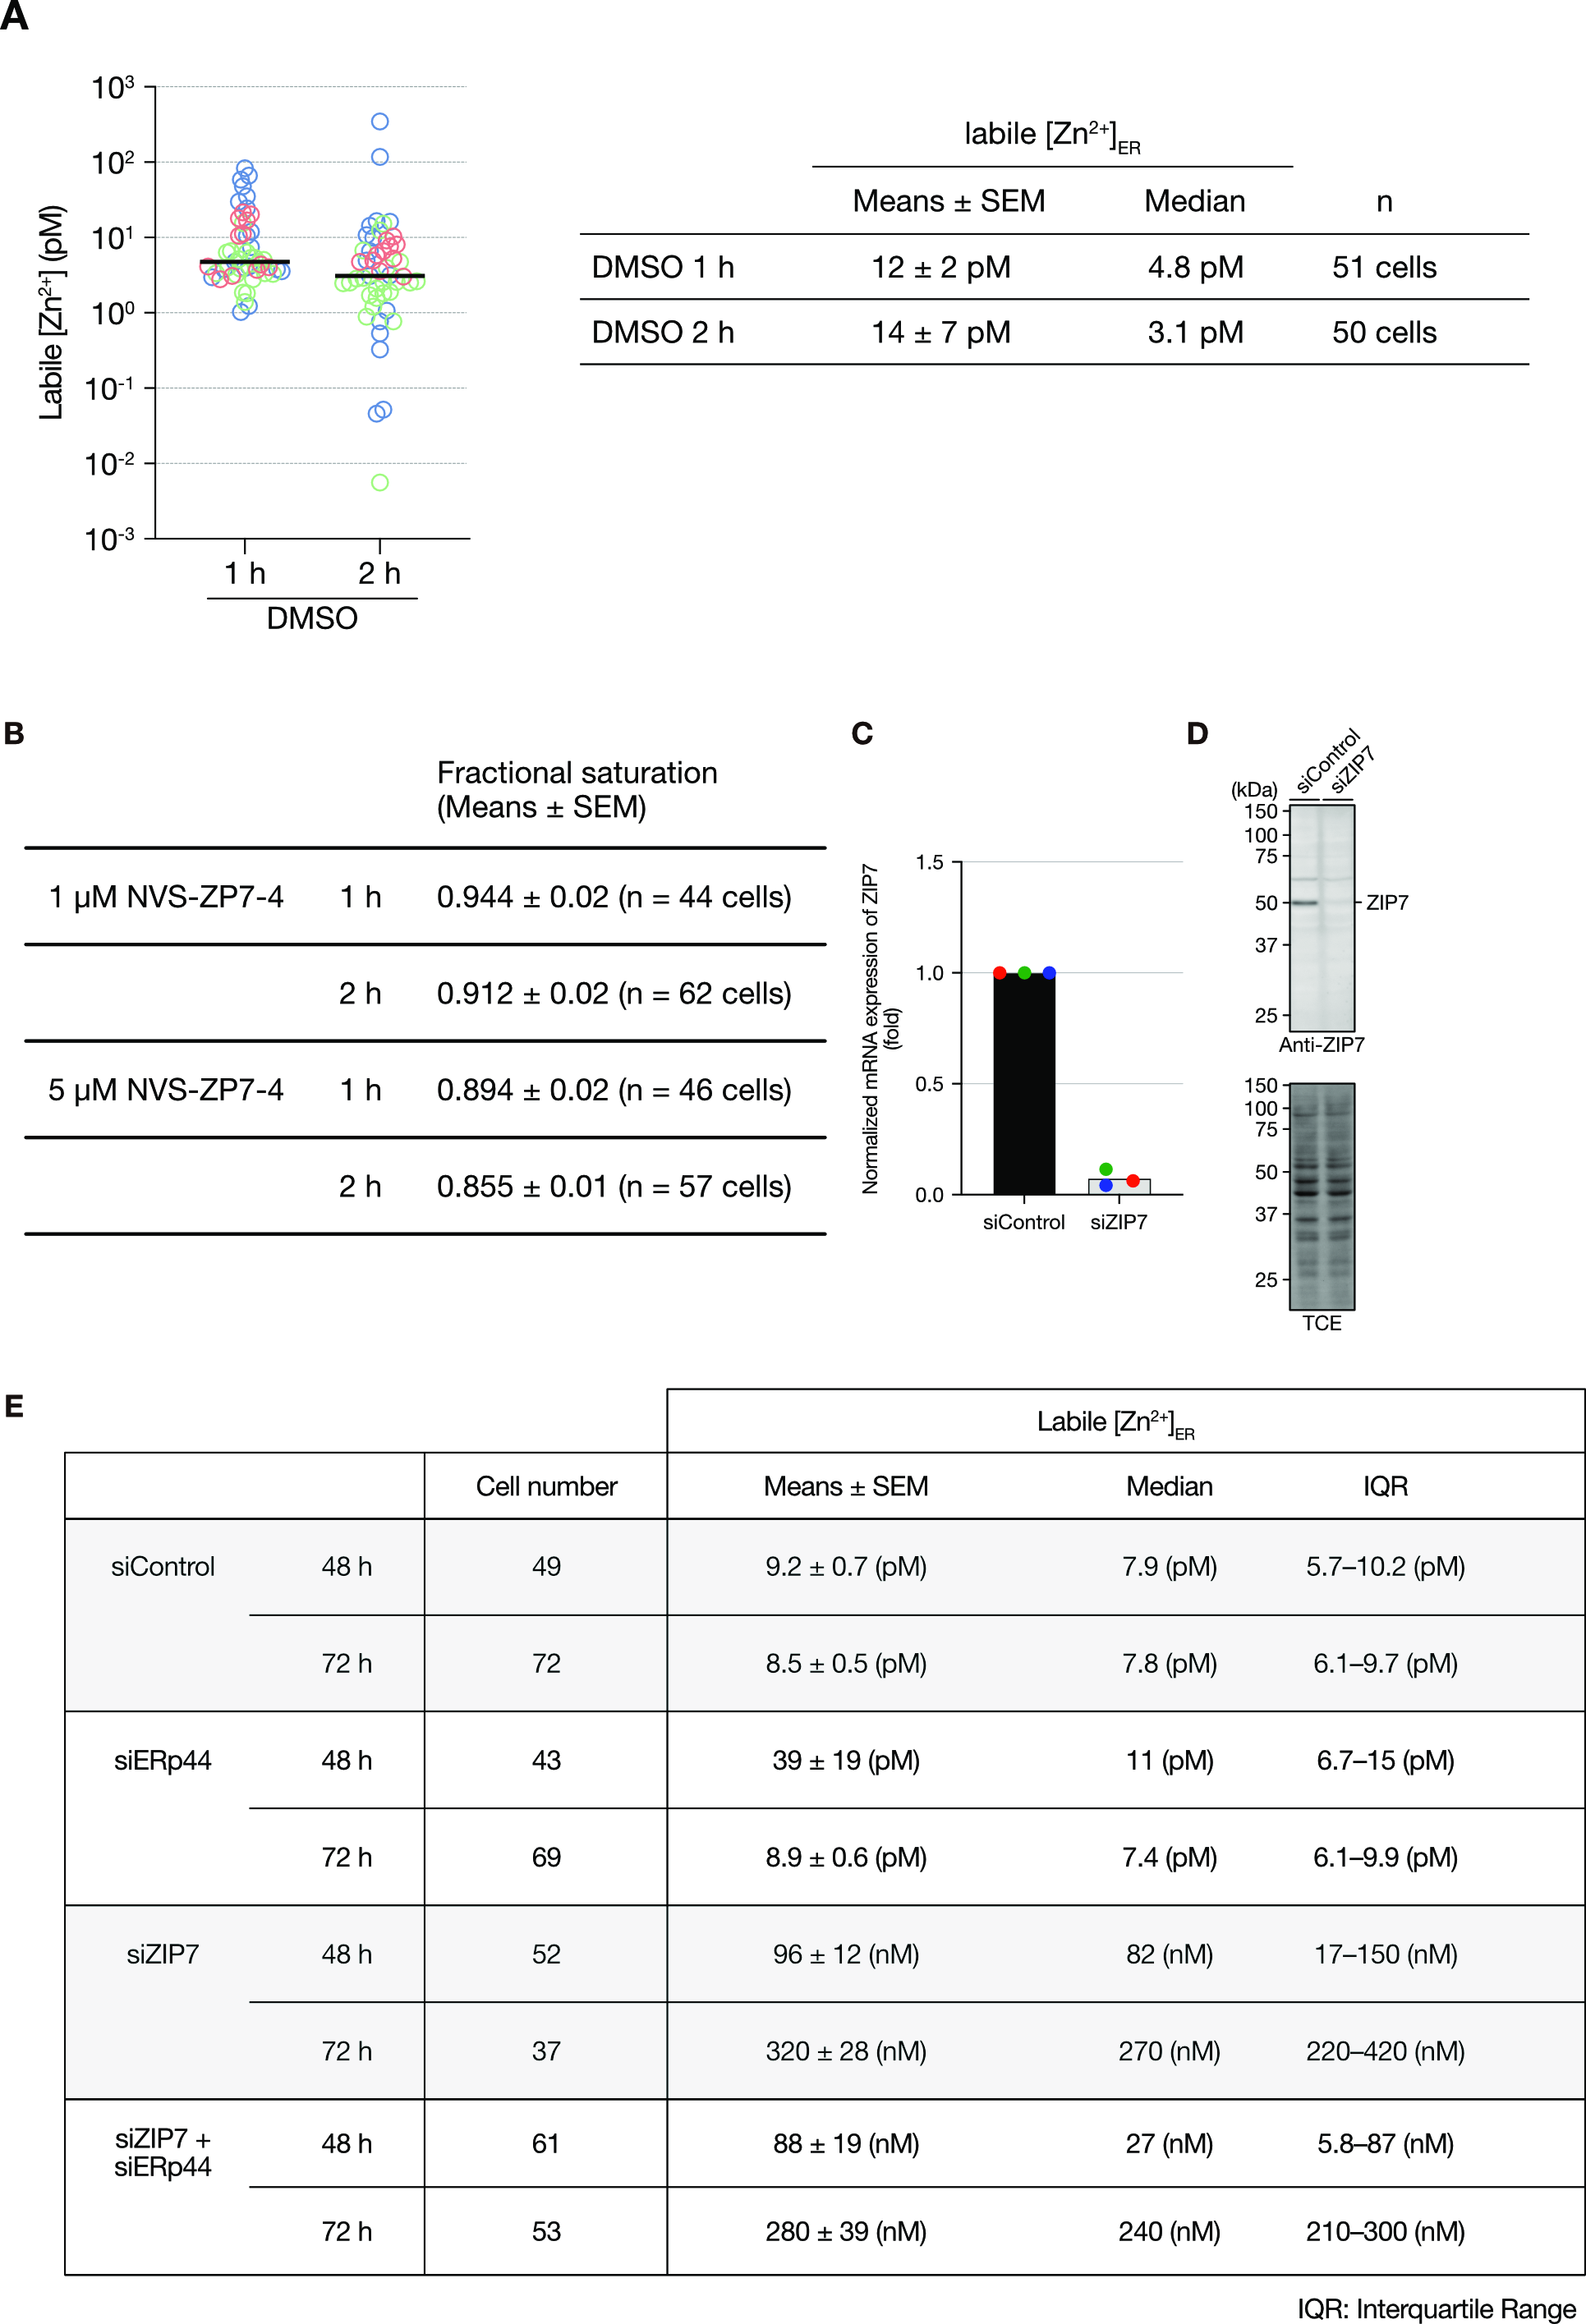
**

**Supplementary Figure 1 Quantification of the labile [Zn2+]ER in DMSO or siRNA treated cells**

(A) Quantification data of the labile [Zn2+]ER in DMSO-treated HeLa Kyoto cells. Circles indicate individual data points obtained from three independent experiments.

(B) Quantification data of the fractional saturation of ZnDA-1H in NVS-ZP7-4-treated HeLa Kyoto cells, related to Fig. 1c.

(C) qRT-PCR analysis of the efficiency of siRNA-mediated ZIP7 knockdown. mRNAs were extracted from HeLa Kyoto cells transfected with siZIP7 or siControl RNA for 48 h and subjected to RT-PCR. qRT-PCR was performed using CFX96 Touch Deep Well (N = 3). The PGK1 gene was used as the internal control.

(D) (Upper) Immunoblotting for ZIP7 to confirm ZIP7-silencing. HeLa Kyoto cells transfected with siZIP7 or siControl RNA for 72 h. Cells were lysed in 1 × SDS sample buffer and homogenized by sonication. Cell lysates were subjected to SDS-PAGE and immunoblotting. (Lower) Loading controls were visualized using TCE.

(E) Summary of the labile [Zn2+]ER quantification, related to Fig. 1e.


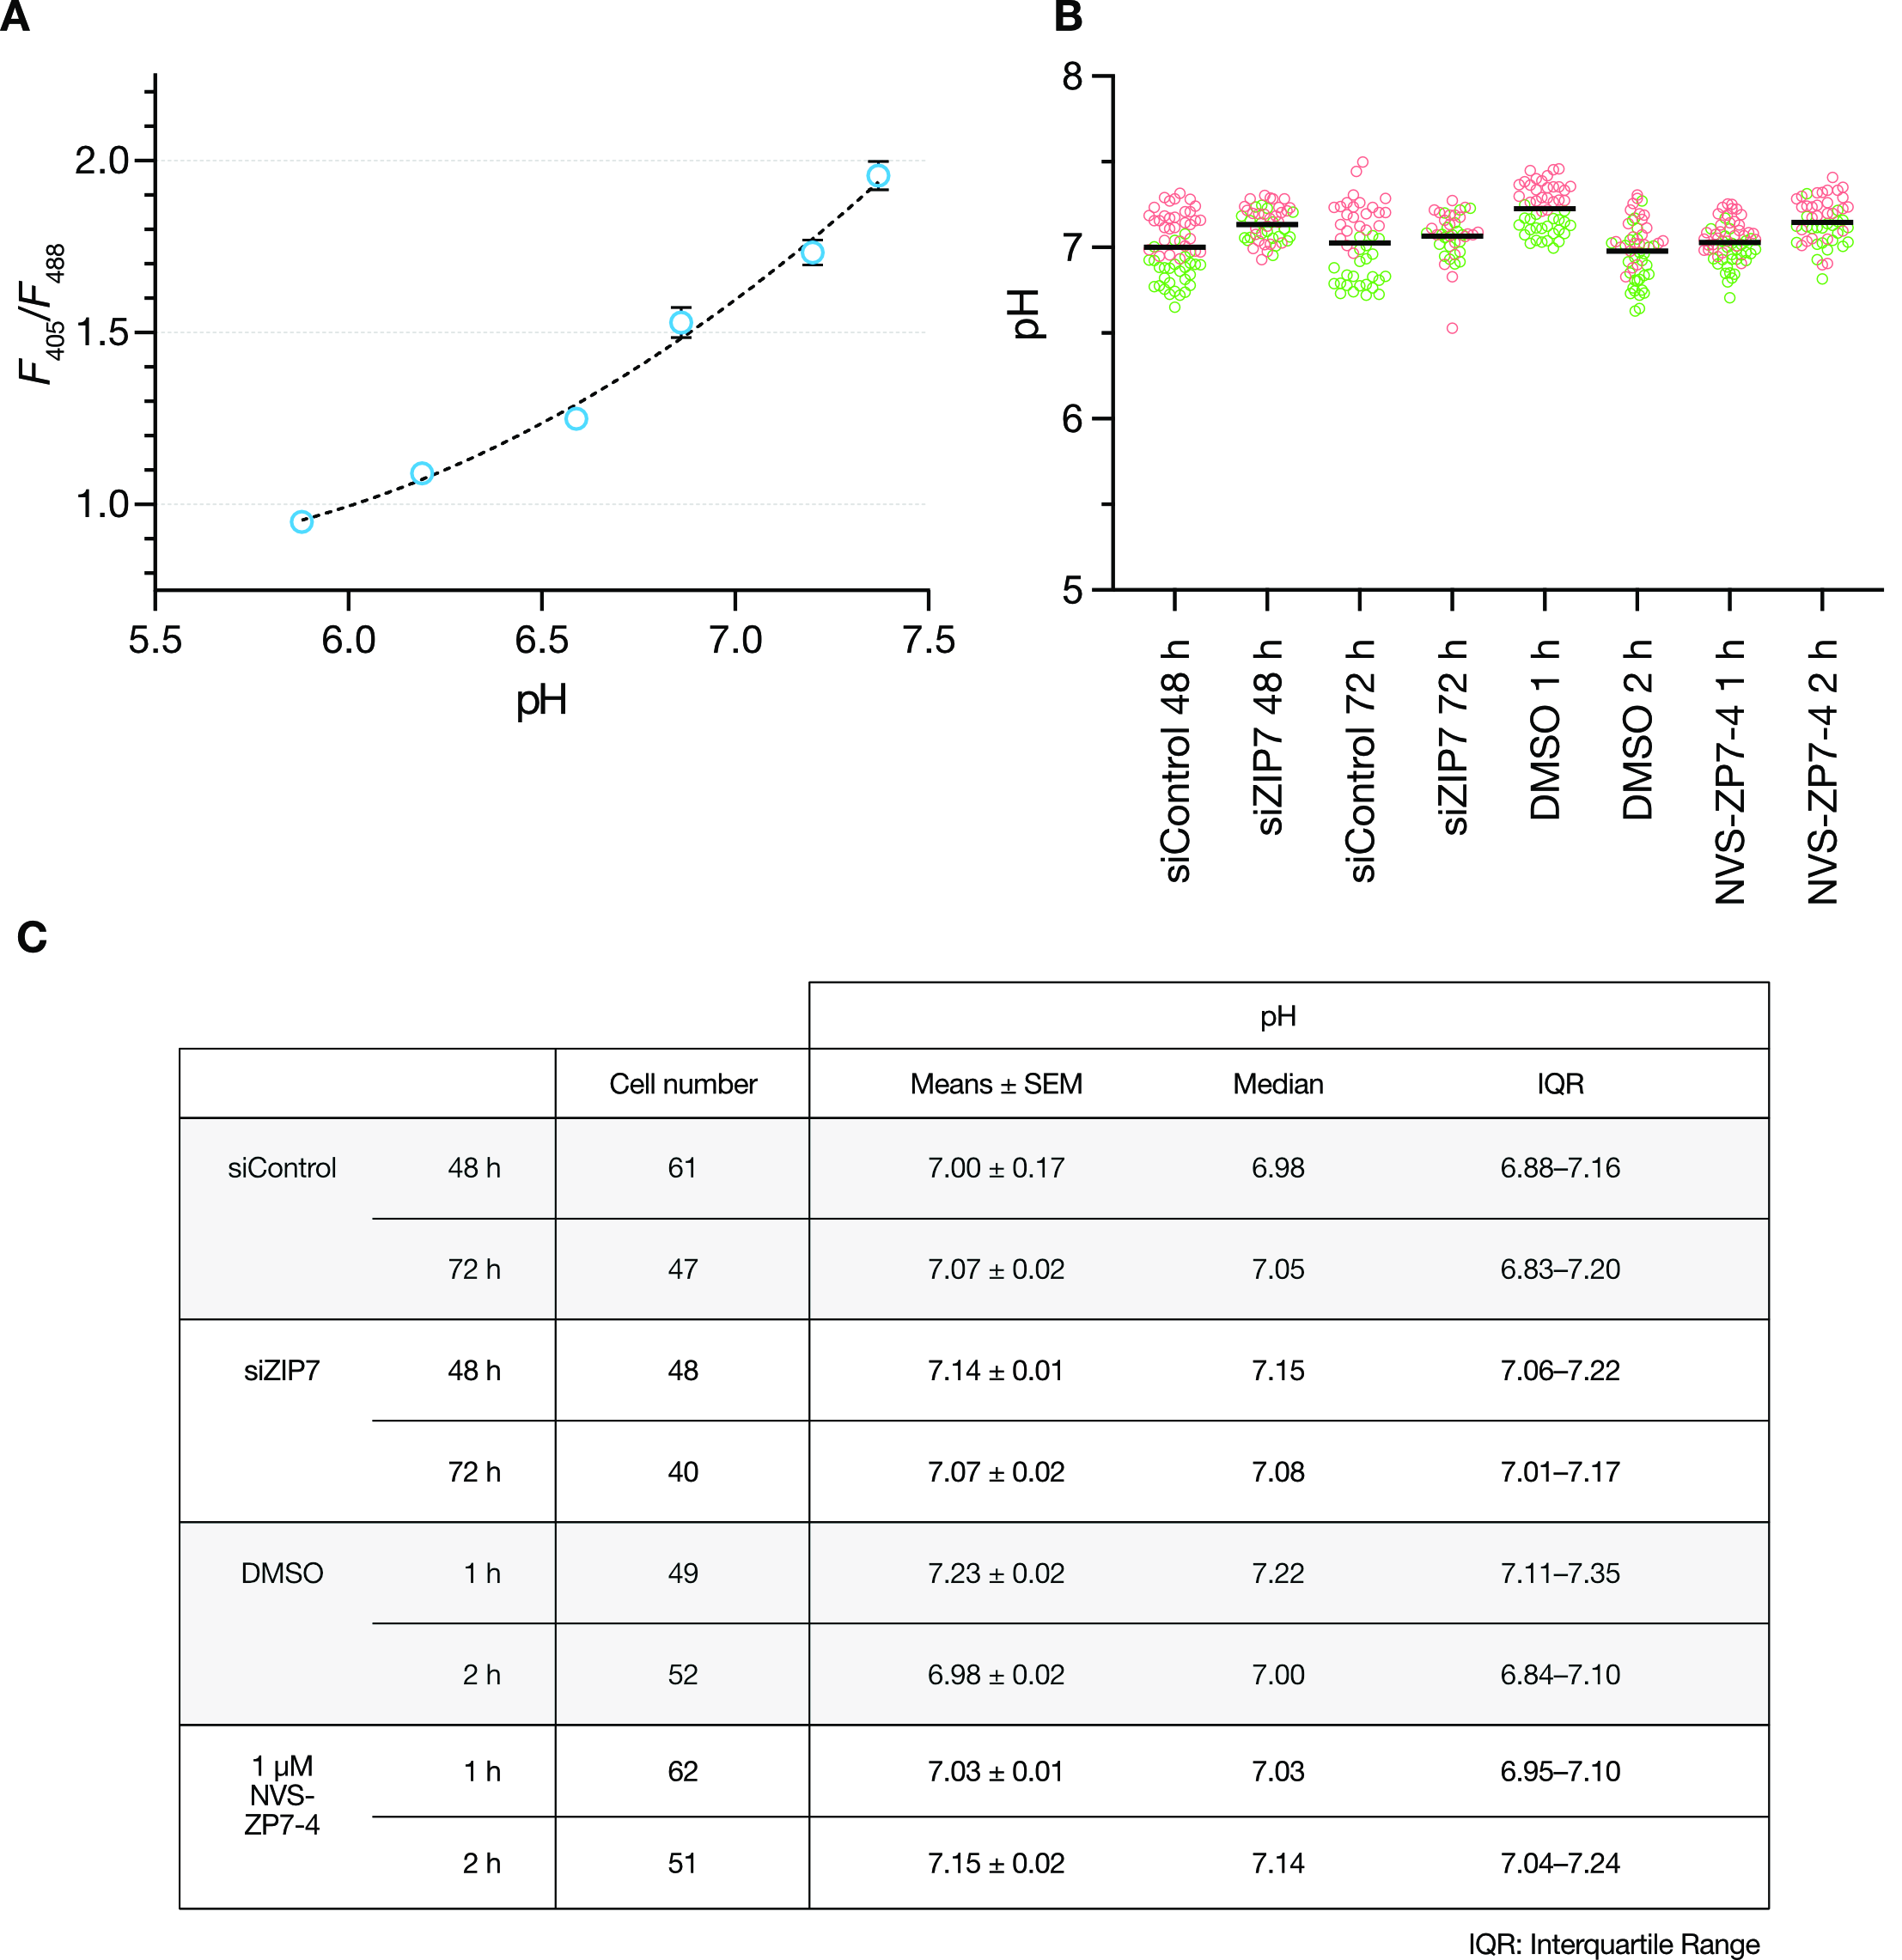


**Supplementary Figure 2 Effects of NVS-ZP7-4 treatment or ZIP7-knockdown on the pH in the ER**

(A) Fluorescence ratios of pHluorin2-immobilized amylose beads in buffers ranging from pH 5.88 to pH 7.37. These values were used for pH calibration for subsequent cellular measurements.In total, ≥ 5 beads were analyzed. Data represent the means ± SEM. The standard curve was calculated using Prism software.

(B) pH measurement of the ER in HeLa Kyoto cells expressing pHluorin2-STIM1(NN) treated with the indicated siRNA, DMSO, or NVS-ZP7-4 for the indicated durations. Circles and bars indicate individual data points and medians, respectively, obtained from two independent experiments.

(C) Summary of quantification of the pH in the ER


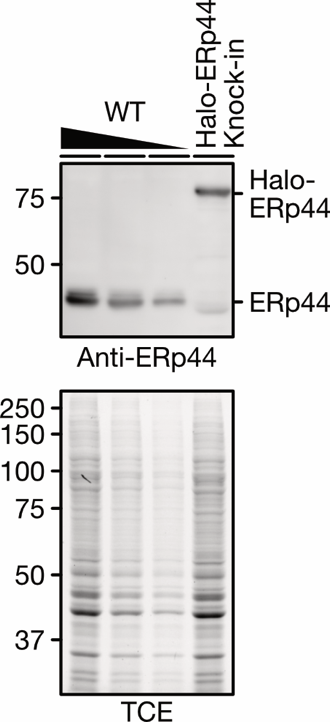


**Supplementary Figure 3 Establishment of Halo-ERp44 knock-in cells**

(Upper) Knock-in of HaloTag into ERp44 was confirmed by immunoblotting using an anti-ERp44 antibody. Endogenous ERp44 expressed in parental HeLa Kyoto cells (WT) was visualized in the same way for reference. (Lower) Loading controls were visualized using TCE.


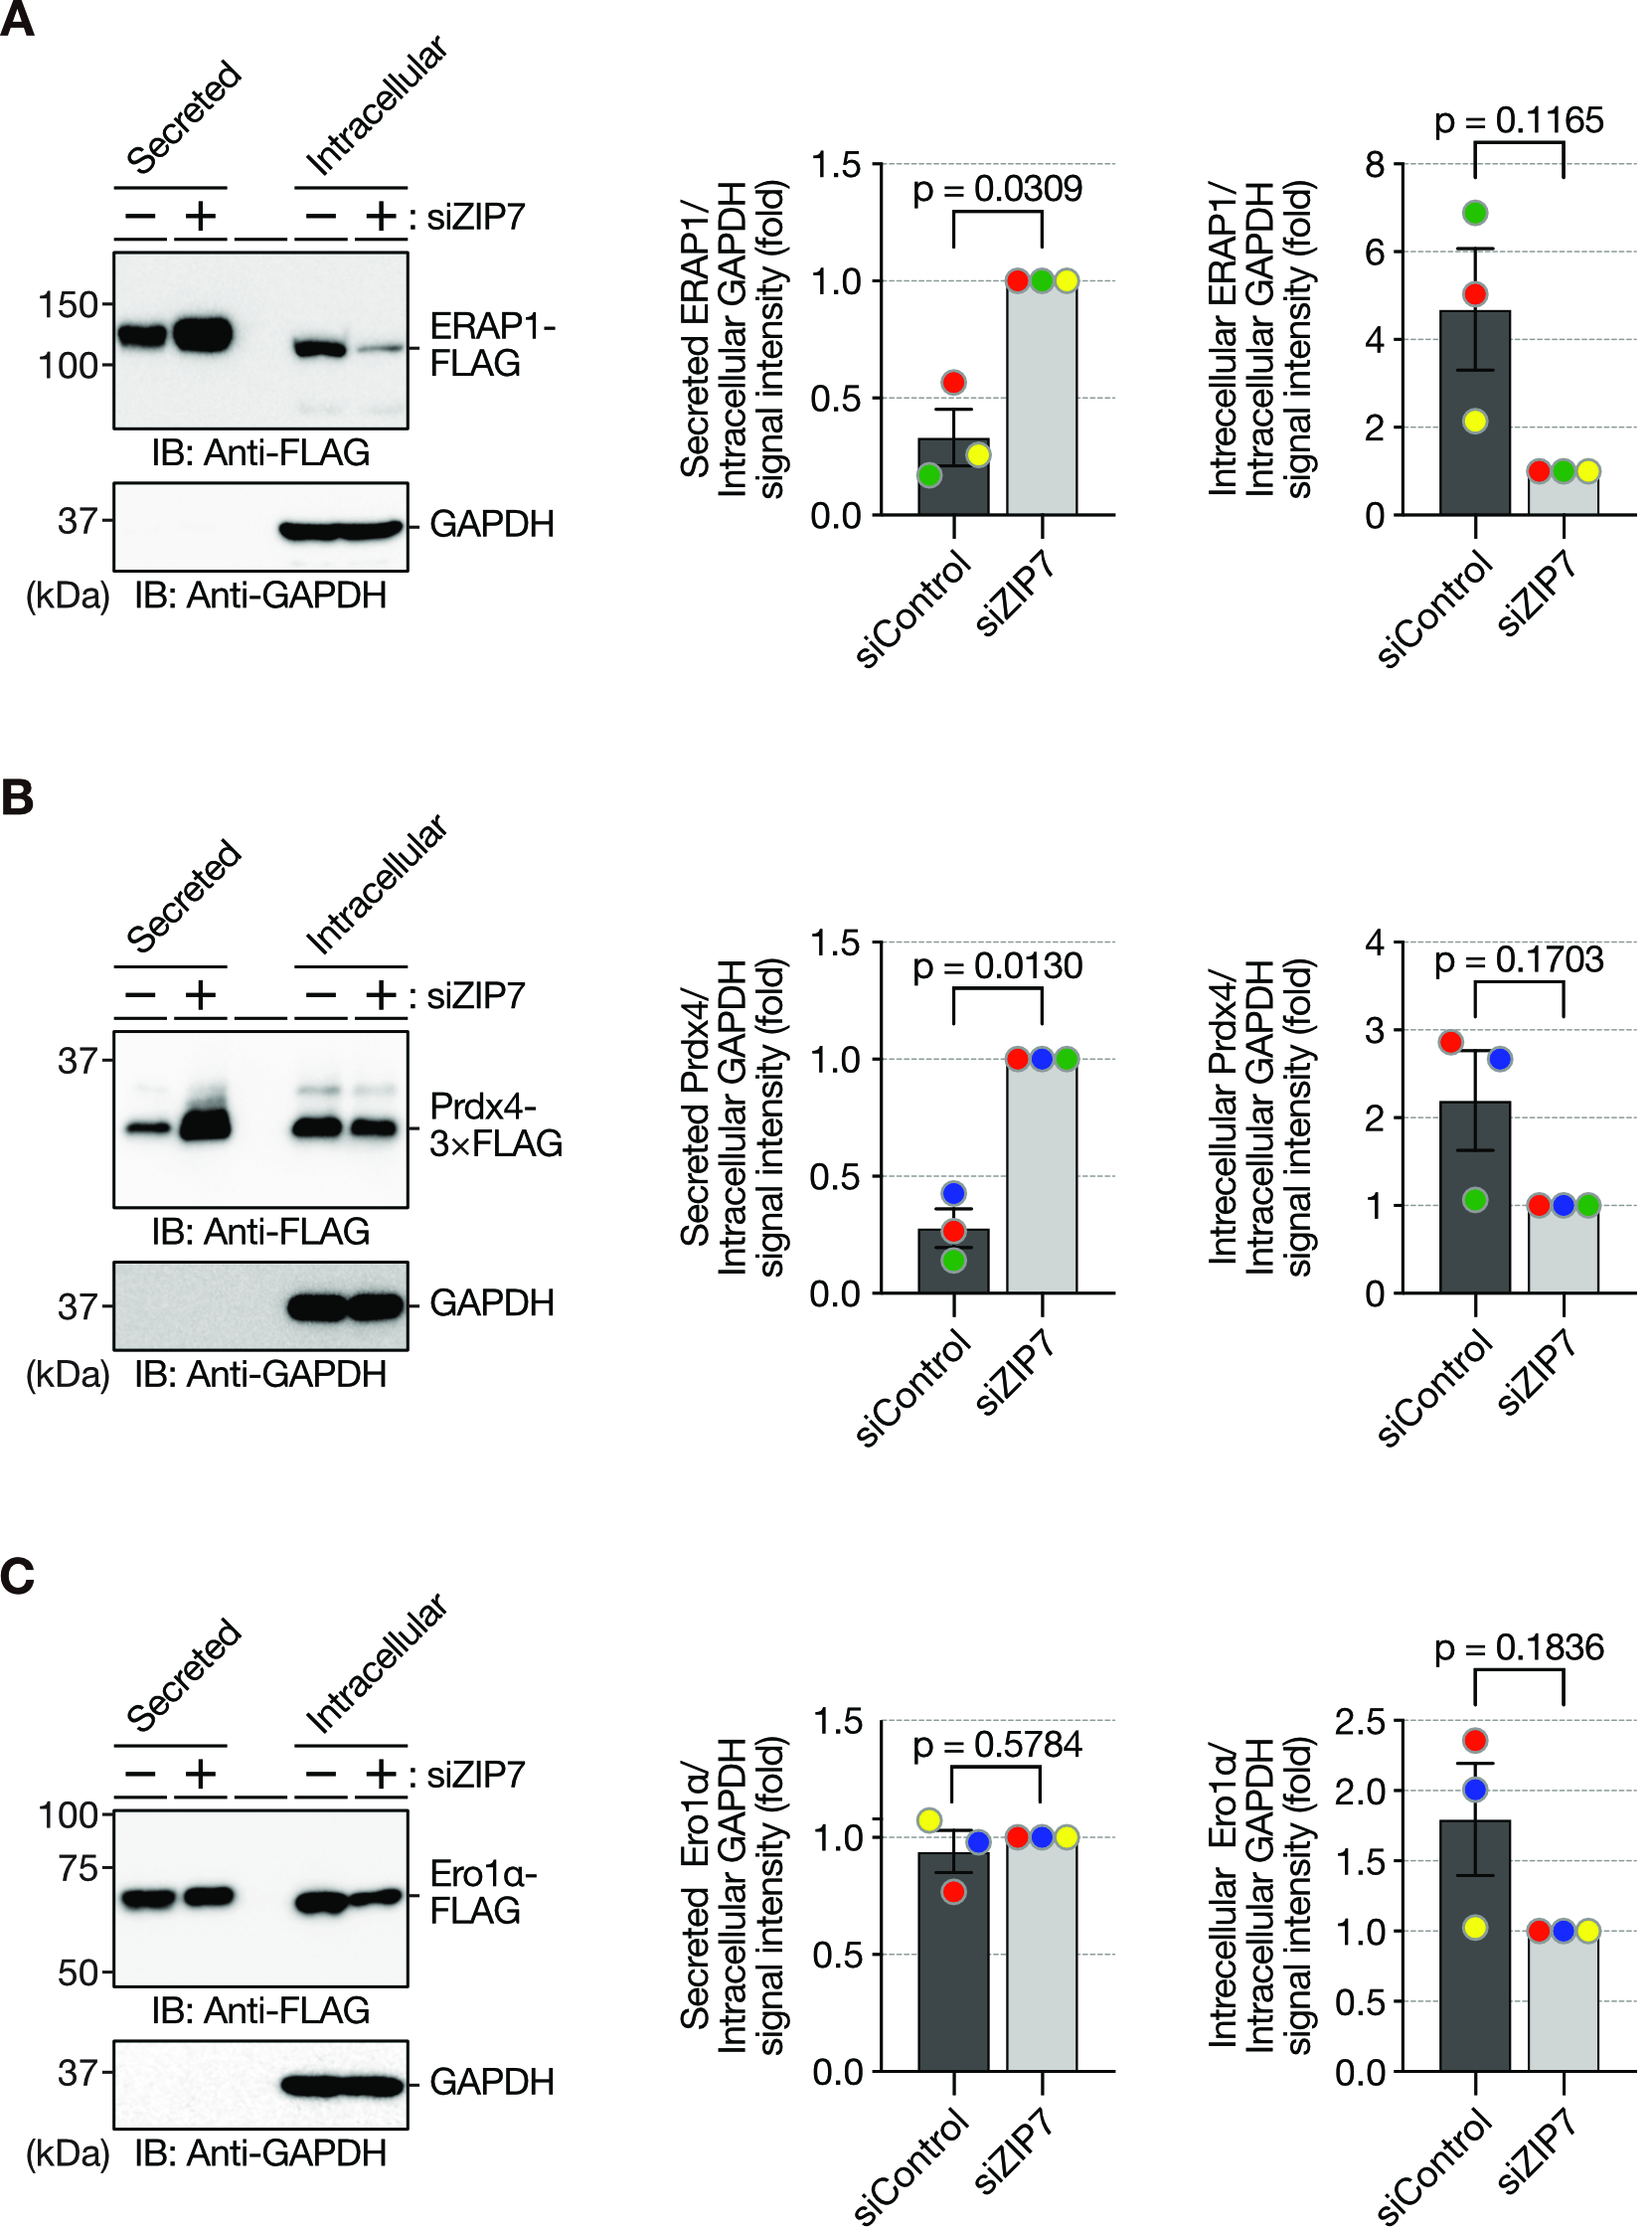


**Supplementary Figure 4 Effects of ZIP7 silencing on the secretion of representative client proteins of ERp44**

(A–C) HeLa Kyoto cells were transfected with siRNAs and incubated for 4 h. Subsequently, cells were transfected with a plasmid expressing ERAP1-FLAG (A), Prdx4-3×FLAG (B), or Ero1α-FLAG (C) and incubated for an additional 36 h. Cells were then washed and incubated with Opti-MEM for 6 h. Proteins in conditioned media were precipitated with ice-cold TCA and dissolved in 1× SDS sample buffer, and remaining cells on the plates were lysed in 1× SDS sample buffer. Samples were analyzed by immunoblotting using the indicated antibodies. Signal intensities of FLAG-tagged proteins were normalized to that of intracellular GAPDH. Quantification results are shown in the graphs on the right. Bars represent the means ± SEM from three independent experiments (paired t-test).


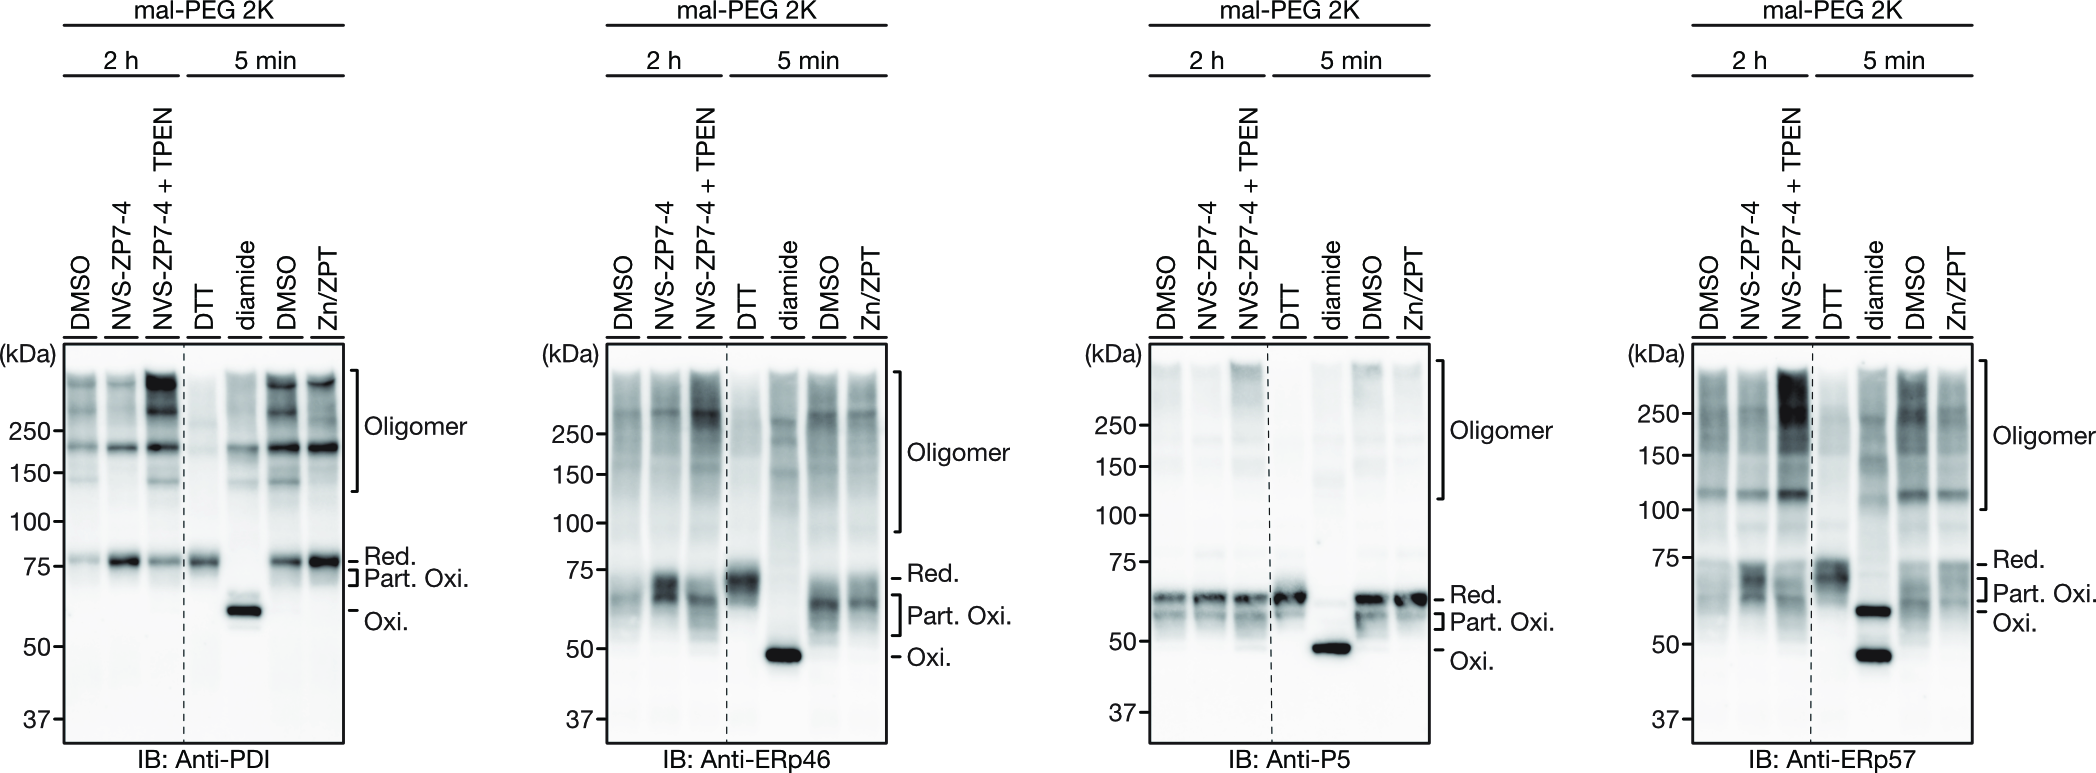


**Supplementary Figure 5 Effects of a zinc-chelator and zinc ionophore on the redox states of PDIs**

HeLa Kyoto cells were incubated with 1 µM NVS-ZP7-4, with or without 10 µM TPEN, for 2 h, or with 2.5 µM ZPT and 400 µM ZnSO4 for 5 min. To prepare fully reduced and oxidized forms of PDIs as controls, cells were treated with 5 mM DTT or 3 mM diamide for 5 min. Cells were treated with ice-cold 10% TCA. Free thiols were alkylated with mal-PEG 2K. These samples were analyzed by SDS-PAGE and immunoblotting using the indicated antibodies. Note that while addition of TPEN reversed the reduction of PDIs caused by NVS-ZP7-4 treatment, ZPT treatment induced a similar reduction of PDIs as observed with NVS-ZP7-4.


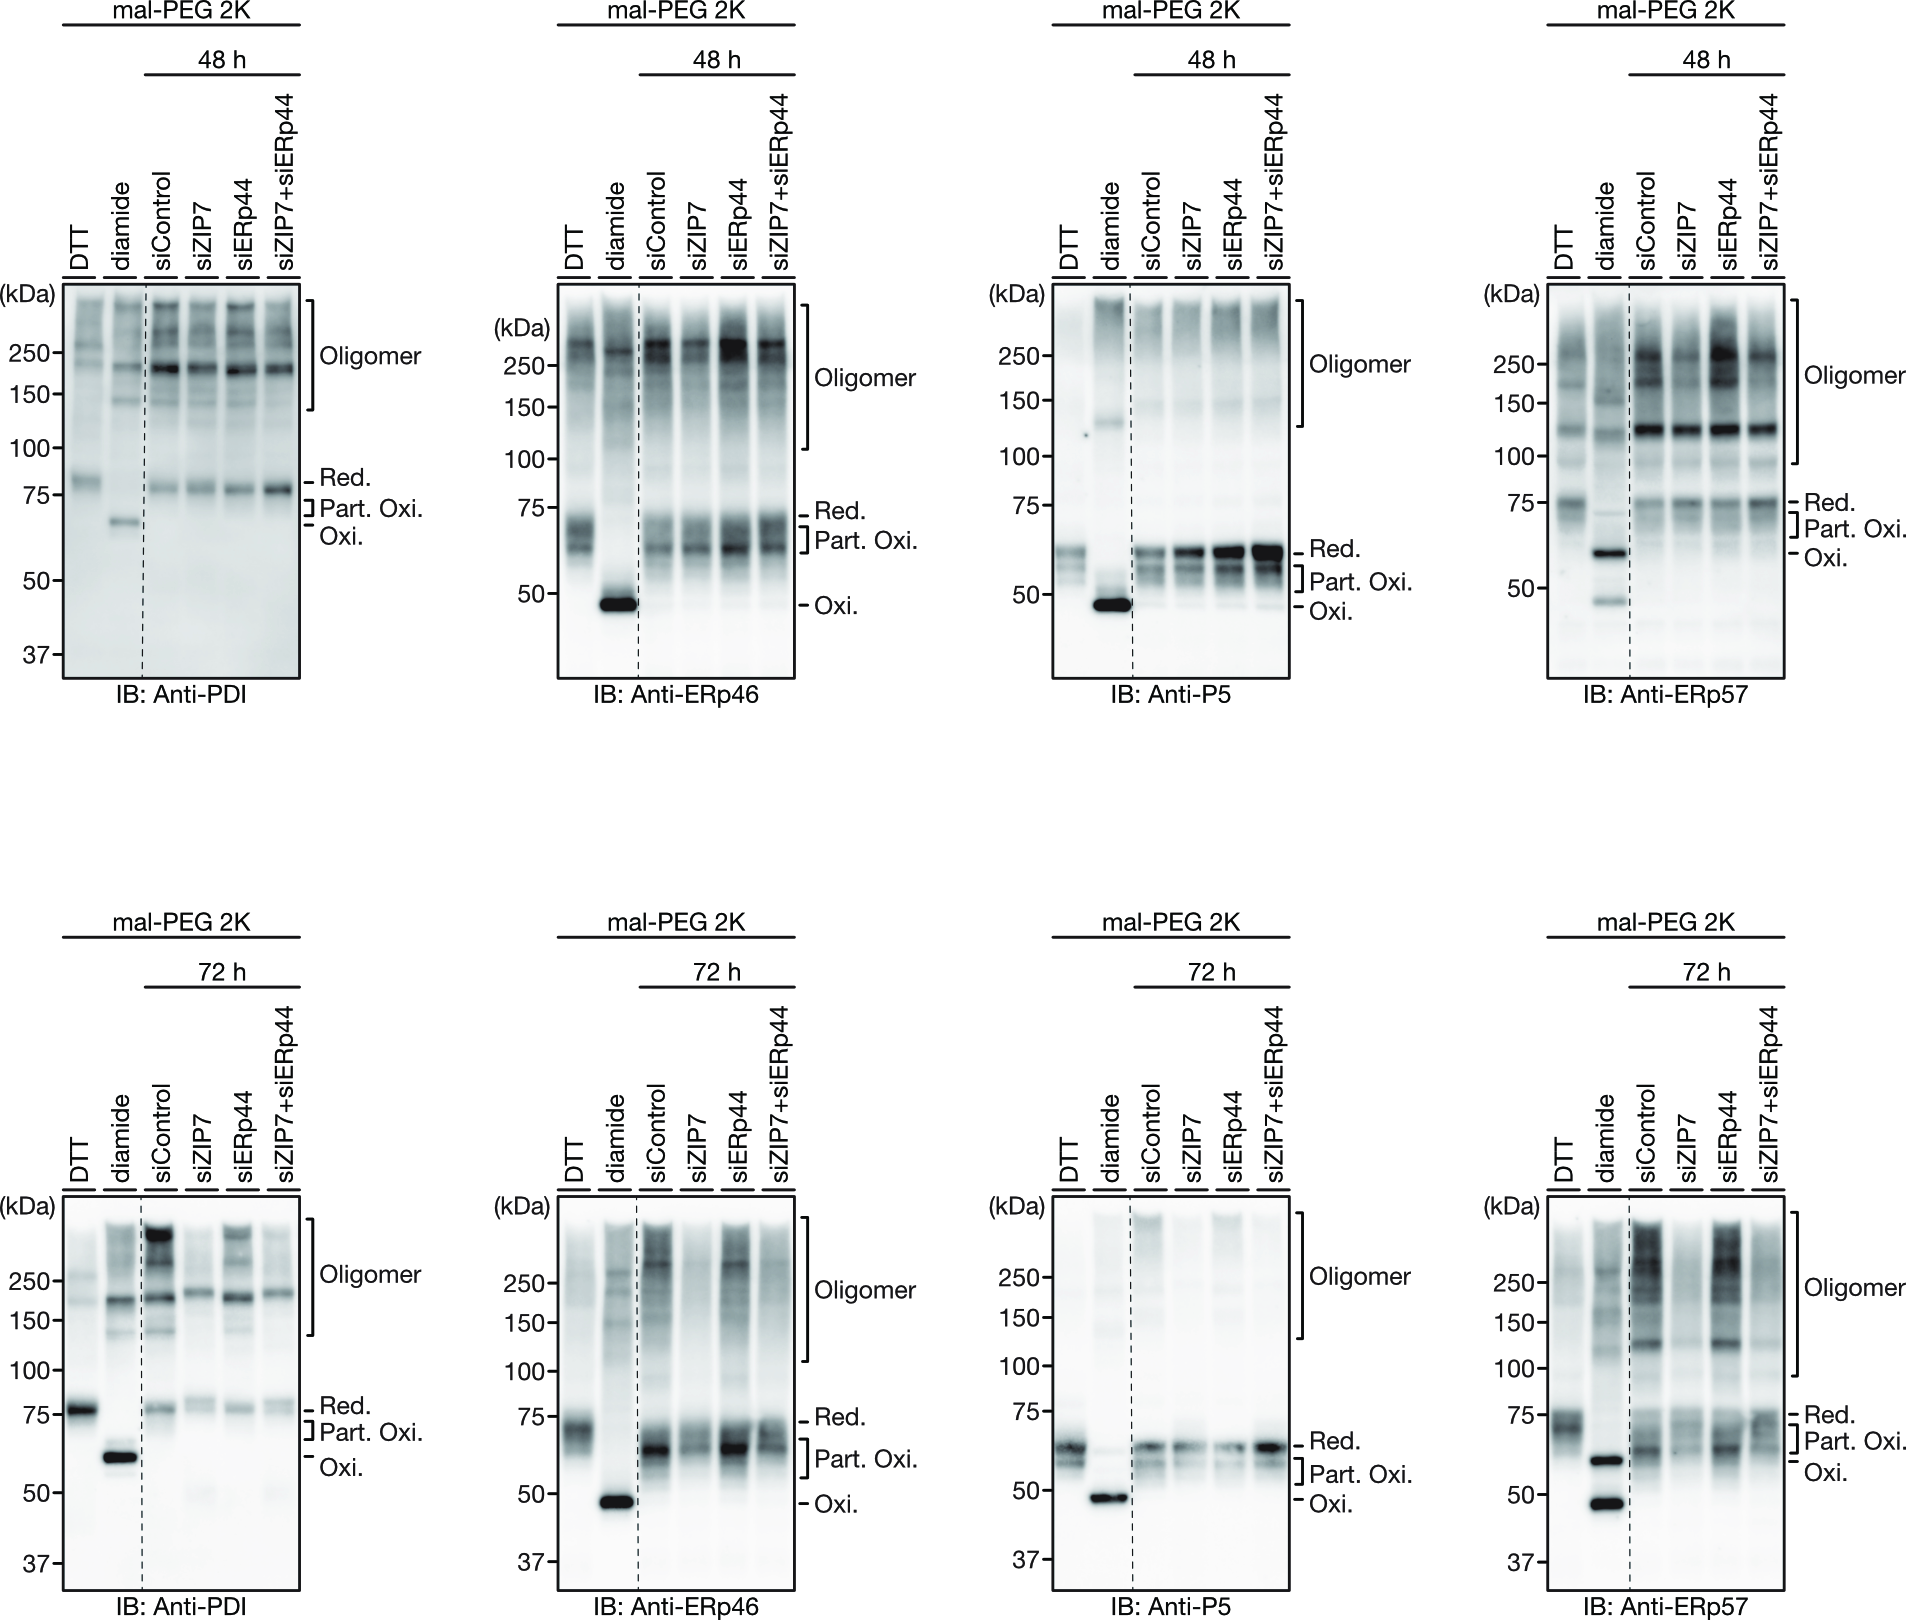


**Supplementary Figure 6 Effects of ZIP7- and/or ERp44-silencing on the redox states of PDIs**

HeLa Kyoto cells were transfected with the indicated siRNAs for 72 h and subsequently treated with ice-cold 10% TCA. To prepare fully reduced and oxidized forms of PDIs as controls, cells were treated with DTT and diamide, respectively. Free thiols were then alkylated with mal-PEG 2K. These samples were analyzed by SDS-PAGE, followed by immunoblotting using the indicated antibodies. ZIP7 silencing (siZIP7) led to a decrease of disulfide-linked oligomers involving PDIs and an increase of the reduced monomeric forms of PDIs, compared with cells transfected with control siRNA (siControl). By contrast, ERp44 silencing (siERp44) had marginal effects on the redox states of PDIs.


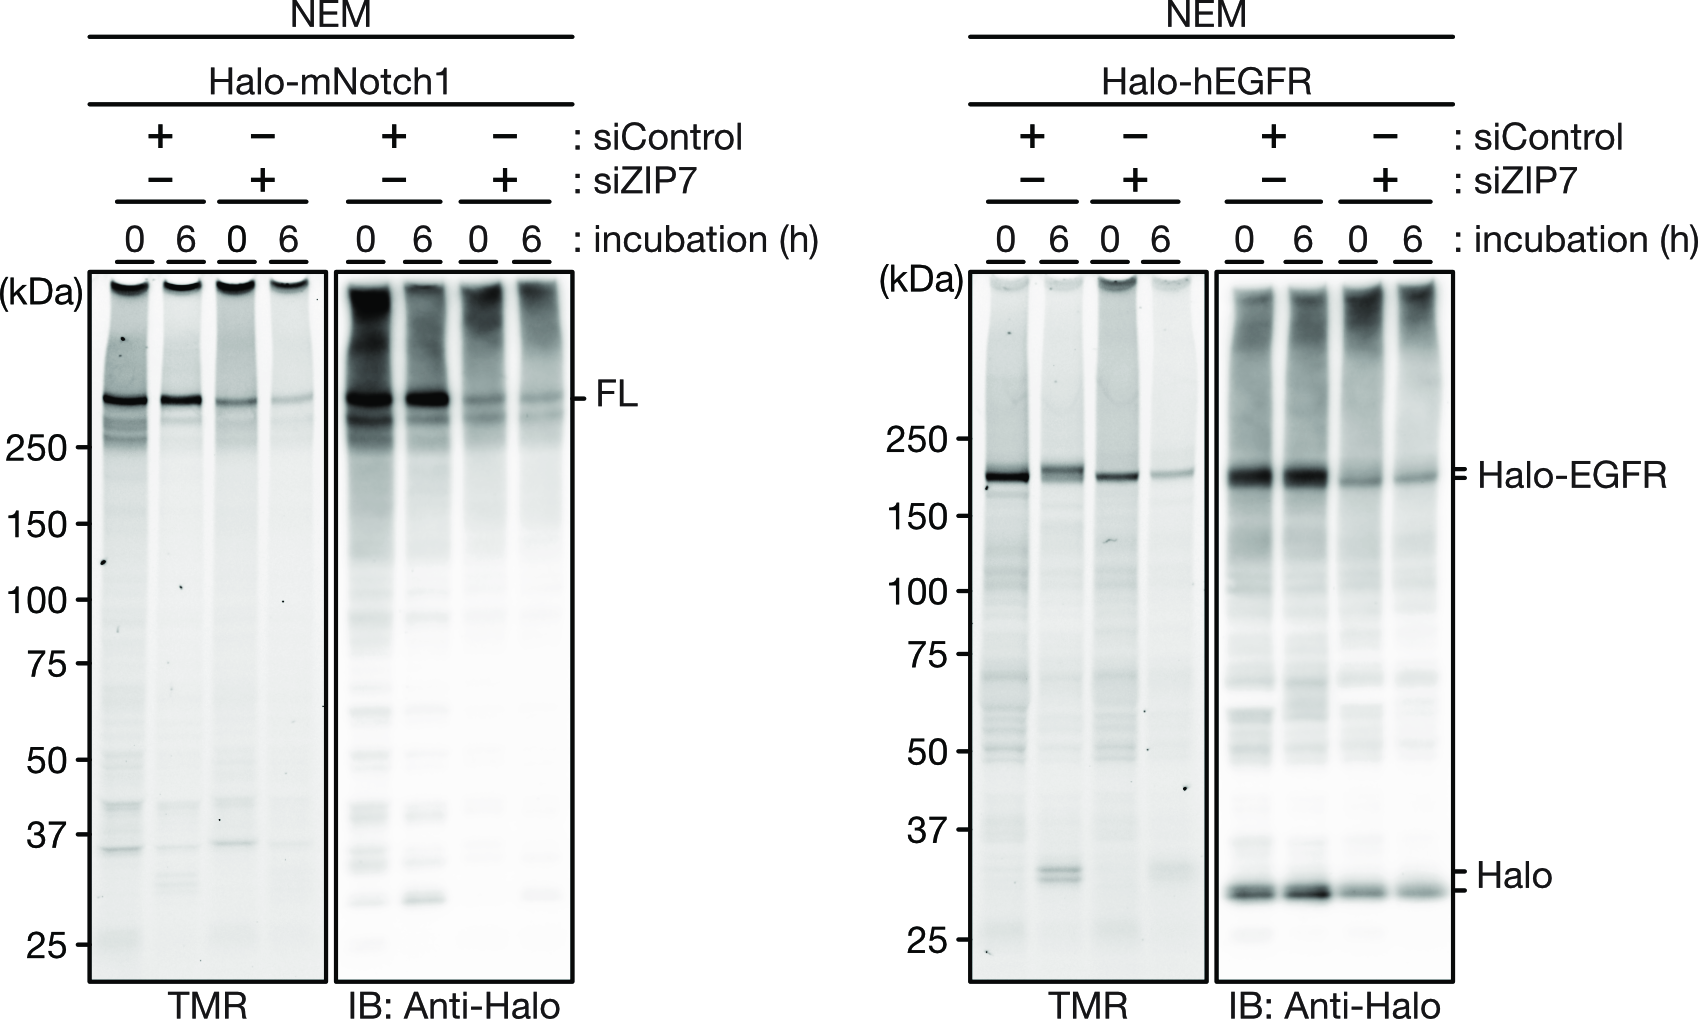


**Supplementary Figure 7 Visualization of NEM-alkylated Halo-mNotch1 and Halo-hEGFR**

HeLa Kyoto cells were treated as in Fig. 7 A or D, except for alkylation of the cell lysates was performed with NEM instead of mal-PEG 2K. Lysates containing 20 µg of proteins were analyzed by SDS-PAGE, and Halo-tagged proteins were visualized by TMR fluorescence or immunoblotting using an anti-Halo antibody. In the case of NEM alkylation, the band positions of Halo-Notch1 and Halo-EGFR were similar in the siControl and siZIP7 samples. By contrast, mal-PEG 2K alkylation markedly retarded their gel electrophoretic migration upon ZIP7 silencing (Fig. 7b–f), suggesting that ZIP7 silencing inhibits disulfide bond formation in these membrane receptors.

**Supplementary Table 1. Sequences of siRNAs used in this study**

| Name | Target Gene | siRNA ID | Sense sequence (5'-3') | Antisense sequence (5'-3') |
| --- | --- | --- | --- | --- |
| siZIP7 #1 | SLC39A7 | s15480 | CAGUGGAAUUGUUGCCUUUTT | AAAGGCAACAAUUCCACUGAG |
| siZIP7 #2 | SLC39A7 | s15479 | CGCUCACAGUCAUACACGUTT | ACGUGUAUGACUGUGAGCGTG |
| siERp44 #1 | TXNDC4 | s22967 | GAUUGUCCUGUAAUCGCUATT | UAGCGAUUACAGGACAAUCTG |
| siERp44 #2 | TXNDC4 | s22965 | GUAGCUCGGCAAUUAAUAATT | UUAUUAAUUGCCGAGCUACTT |
| siKDELR1 #1 | KDELR1 | s546 | CCAACUACAUCUCACUCUATT | UAGAGUGAGAUGUAGUUGGTG |
| siKDELR1 #2 | KDELR1 | s548 | CUACCUCUAUAUCACCAAATT | UUUGGUGAUAUAGAGGUAGAA |
| siKDELR2 #1 | KDELR2 | s21687 | AGACCAUCCUAUACUGUGATT | UCACAGUAUAGGAUGGUCUGG |
| siKDELR2 #2 | KDELR2 | s21688 | CUACCUUGCCUGCUCCUAUTT | AUAGGAGCAGGCAAGGUAGAT |
| siKDELR3 #1 | KDELR3 | s21690 | GAAUUUCUAUGACCAAAUUTT | AAUUUGGUCAUAGAAAUUCTC |
| siKDELR3 #2 | KDELR3 | s21692 | AGACCAUAACUACUCACUATT | UAGUGAGUAGUUAUGGUCUCA |

**Supplementary Table 2. IDs of PrimePCR assays used for qRT-PCR experiments**

| Gene | PrimePCR assay ID |
| --- | --- |
| SLC39A7 (ZIP7) | qHsaCED0037069 |
| DNADJ9 (ERdj4) | qHsaCED0001382 |
| SEC61A | qHsaCID0011040 |
| HSPA5 | qHsaCED0042097 |
| SEL1L | qHsaCED0042308 |
| DDIT3 (CHOP) | qHsaCED0056908 |
| PPP1R15A | qHsaCED0019942 |
| PGK1 | qHsaCED0042912 |

**Supplementary Table 3. Primers used in this study**

| Name | Sequence (5’–3’) |
| --- | --- |
| pRUSH_KDEL Fw | AAAGATGAACTGTGACCGCGGCCGCATAGATAA |
| pRUSH_KDEL Rv | TCACAGTTCATCTTTCGGTCCGAGCTGCTGGAC |
| hSTIM14 Halo fw | GGCCATGGCAGAAATCGGTACTGG |
| hSTIM18 Halo rv | TCAGAGTTGTTATCGCTCTGAAAGTACAGATCC |
| Halo11 hSTIM1 114-97 rv | ATTTCTGCCATGGCCCCCGAGCTGGTTCC |
| Halo8 hSTIM1 115-141 fw | GCGATAACAACTCTGAGGAGTCCACTGCAGCAGAG |
| HaloFw | ATGGCAGAAATCGGTACTGGCTT |
| Halo Rv | GTTATCGCTCTGAAAGTACAGATCCTCAGT |
| mNotch1ssRv_Halo | ACCGATTTCTGCCATGGCGAGCGCGGGCAGCAG |
| HalomNotch1Fw | TTTCAGAGCGATAACGCAAGAGGCTTGAGATGCTCCCAGCCA |
| EGFRssRv_Halo | ACCGATTTCTGCCATAGCCCGACTCGCCGGGCA |
| HaloEGFRFw | TTTCAGAGCGATAACCTGGAGGAAAAGAAAGTTTGCCAAGGCACGA |
| ssHalo44KI_5arm_1stFw | GCAGGATAGAATCAGCAGACTTAG |
| ssHalo44KI_3arm_1stRv | GGCTGTGTCCTAAGGTCATTAAC |
| ssHalo44KI_5arm_Fw | TATTCCCAGTTTTCCTAATTCCTTAG |
| ssHalo44KI_5arm_rv | GGAGTAAAAACCCAAGTTACCTGA |
| ssHalo44KI_3arm_fw | ATACAGAGAATATAGATGAAATTTTAAGTAAGTACC |
| ssHalo44KI_3arm_Rv | GAGAACTATTGGTCTCTAAGTAGGCTTATC |
| ssHalo44_KIins_fw | CTTGGGTTTTTACTCCTGTAACAAC |
| ssHalo44_KIins_rv | CATCTATATTCTCTGTATCAAGACTTGTTATTTC |
| pcDNA vec rv | TTAGGAAAACTGGGAATATACCAAGCTTAAGTTTAAACGCTAG |
| pcDNA vec fw2 | TAGAGACCAATAGTTCTCCCGTTTAAACCCGCTGATC |
| pHR ERSG Fw | ATCAAGCTTGCGGTACTCACTATAGGGAGACCCAAGCTT |
| pHR ERSG Rv | TAGAGTCGCGGCCGCGAATAGGGCCCTCTAGATGCAT |
| pHR vec1 Fw | TCATCGTTATTGATGACCTGGTGGAT |
| pHR vec1 Rv | TACCGCAAGCTTGATATCCTGC |
| pHR vec2 Fw | GCGGCCGCGACTCTAGAG |
| pHR vec2 Rv | CATCAATAACGATGAAGCCTTCGC |
